# Supplementary material
Source: PubMed Central journal article supplement (PMC3399131)
Supplement: NIHMS377270-supplement-Supp_Fig_S1-S6___Table_S1-S2.pdf [file NIHMS377270-supplement-Supp_Fig_S1-S6___Table_S1-S2.pdf]

## Supplementary Data

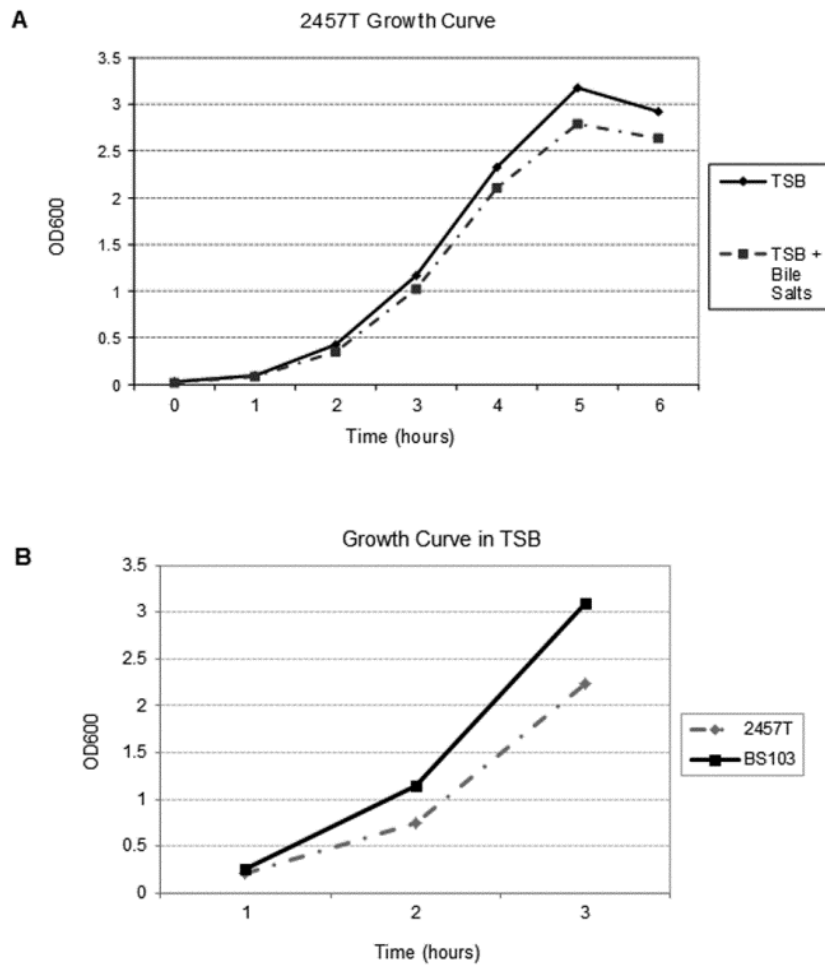

**Supplementary Figure 1A: Exposure to bile salts does not significantly alter the growth of *Shigella flexneri*.** An example of a growth curve is provided. 2457T was subcultured in tryptic soy broth (TSB) alone or with 0.4% w/v bile salts. Growth was measured over the course of 6 hours by taking optical density readings at 600 nm (OD<sub>600</sub>). Bacteria exposed to bile salts grew at the same rate as bacteria subcultured in TSB alone, especially during mid-log phase. The data indicated that exposure to bile salts did not affect the growth rate of *S. flexneri*.

**Supplementary Figure 1B: The virulence plasmid-cured strain BS103 grows faster than wildtype 2457T.** An example of a growth curve is provided in which both strains were subcultured in TSB.

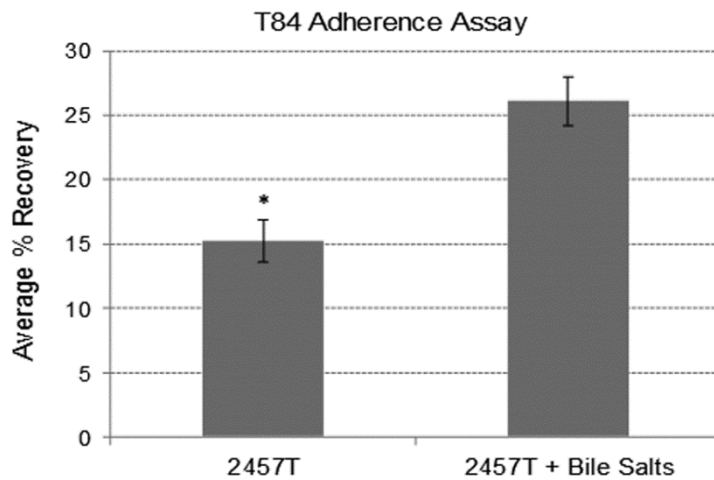

**Supplementary Figure 2: Bile salts increase adherence of 2457T to a monolayer of T84 cells.**

Bacteria were subcultured with or without 0.4% w/v bile salts and applied to semi-confluent monolayers of T84 cells for 3 hours. Wildtype *S. flexneri* strain 2457T consistently had a significant increase in adherence after being exposed to the bile salts during subculture. Analysis was performed for three independent experiments. Plotted is the average percent (%) recovery of the adherent bacteria +/- the standard error. \* =  $p$ -value <0.01, as determined by the student's T-test.

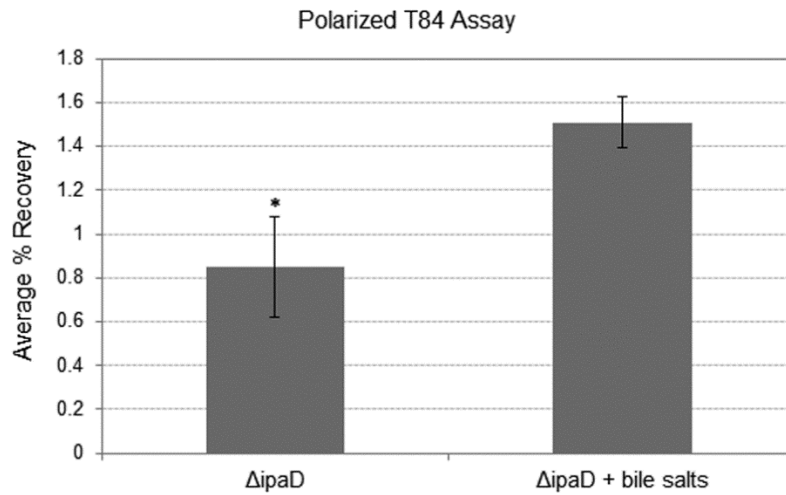

**Supplementary Figure 3: The  $\Delta ipaD$  mutant has increased adherence to polarized T84 cells after bile salts exposure.** Induced adherence was detected despite the fact that this mutation causes induced secretion of T3SS effectors. This mutation was constructed in *S. flexneri* serotype 5 strain M90T. \* = *p*-value of 0.028, as determined by the student's T-test.

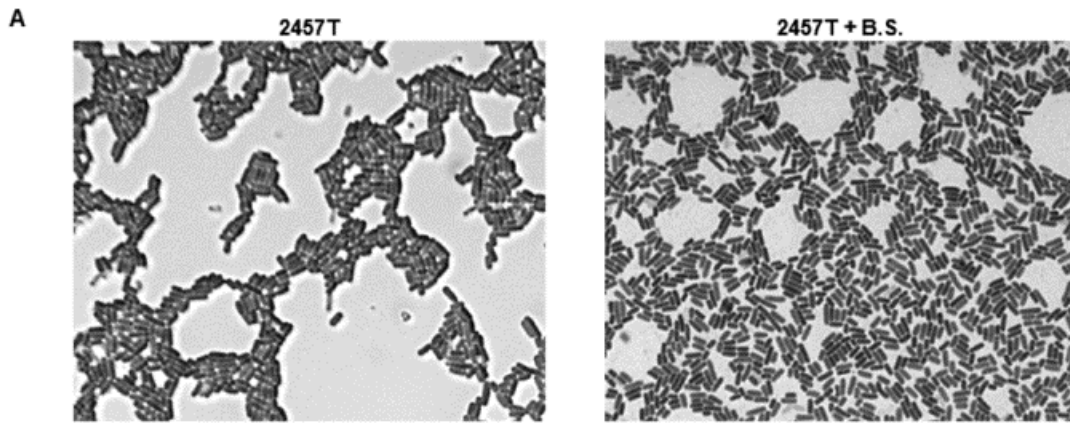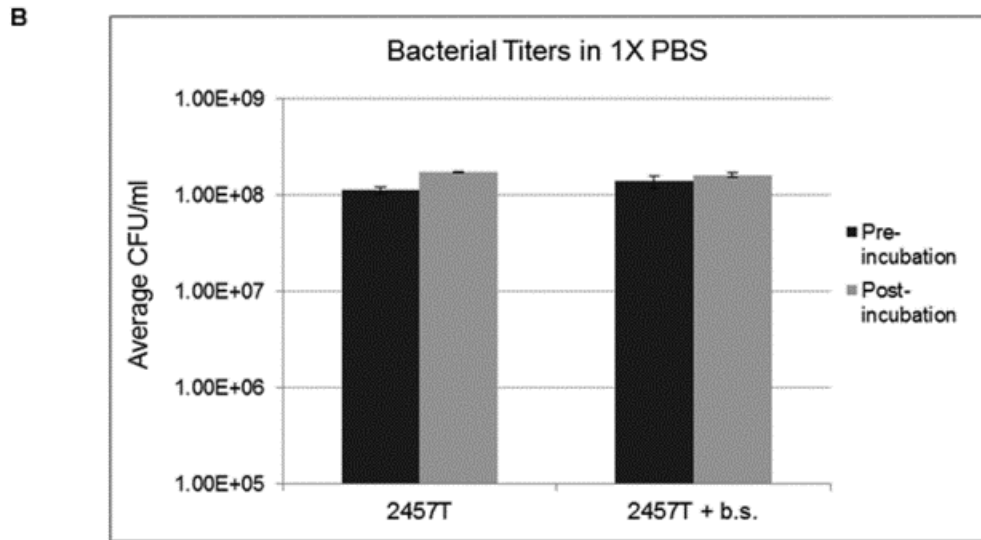

**Supplementary Figure 4: Bile salts do not cause bacterial lysis. A:** The bacteria were prepared as described in the Experimental Procedures for the protein secretion, immunofluorescence, and outer membrane localization assays. The bacteria were pelleted and Giemsa-stained to analyze bacterial cell morphology. Bacteria subcultured in both TSB with or without bile salts had a normal shape.

**B:** Bacterial viability was demonstrated by determining the bacterial titers (colony forming units (CFU)/ml) before and after incubation at 37°C for 1 hour in 1X PBS. The average recovered CFU/ml is plotted +/- the standard error. The data indicated that no significant lysis of the bacteria occurred.

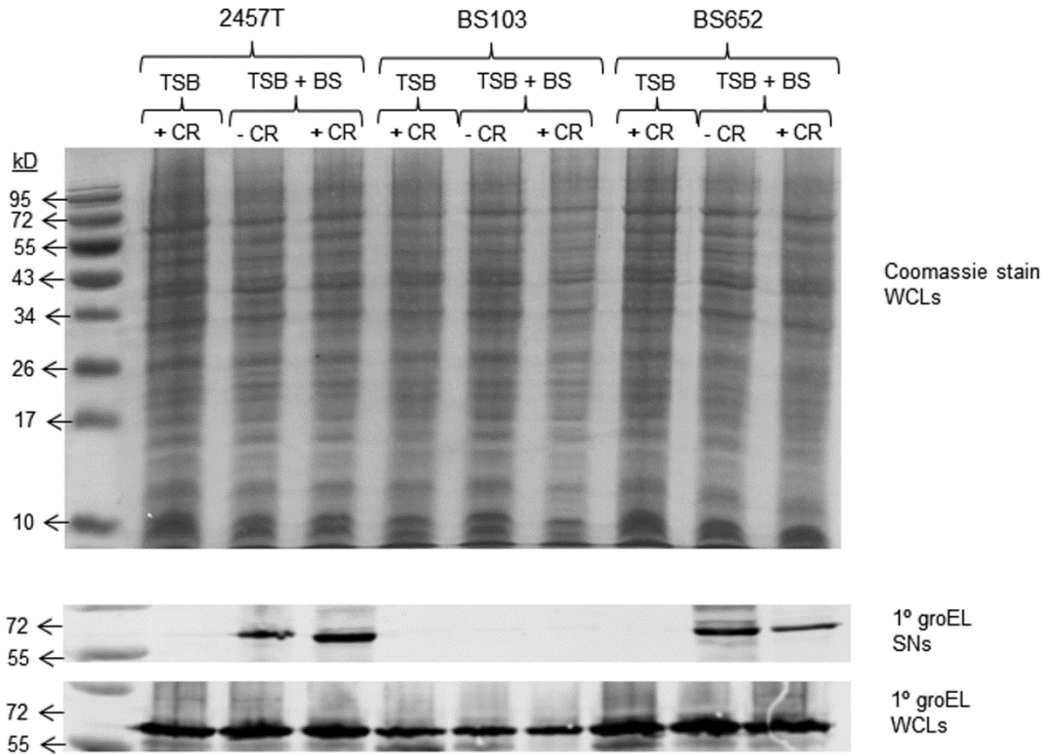

**Supplementary Figure 5: The induced protein secretion that occurs following bile salts exposure is not due to lysis of the bacteria.** The CR assay supernatants from Figure 4 were probed with an antibody that recognizes the cytoplasmic protein GroEL. While GroEL was detected in the supernatants of 2457T and BS652 following bile salts exposure, the protein was not detected in the supernatants of the plasmid-cured strain BS103. The Coomassie-stained whole cell lysates and Western blot for GroEL are also provided.

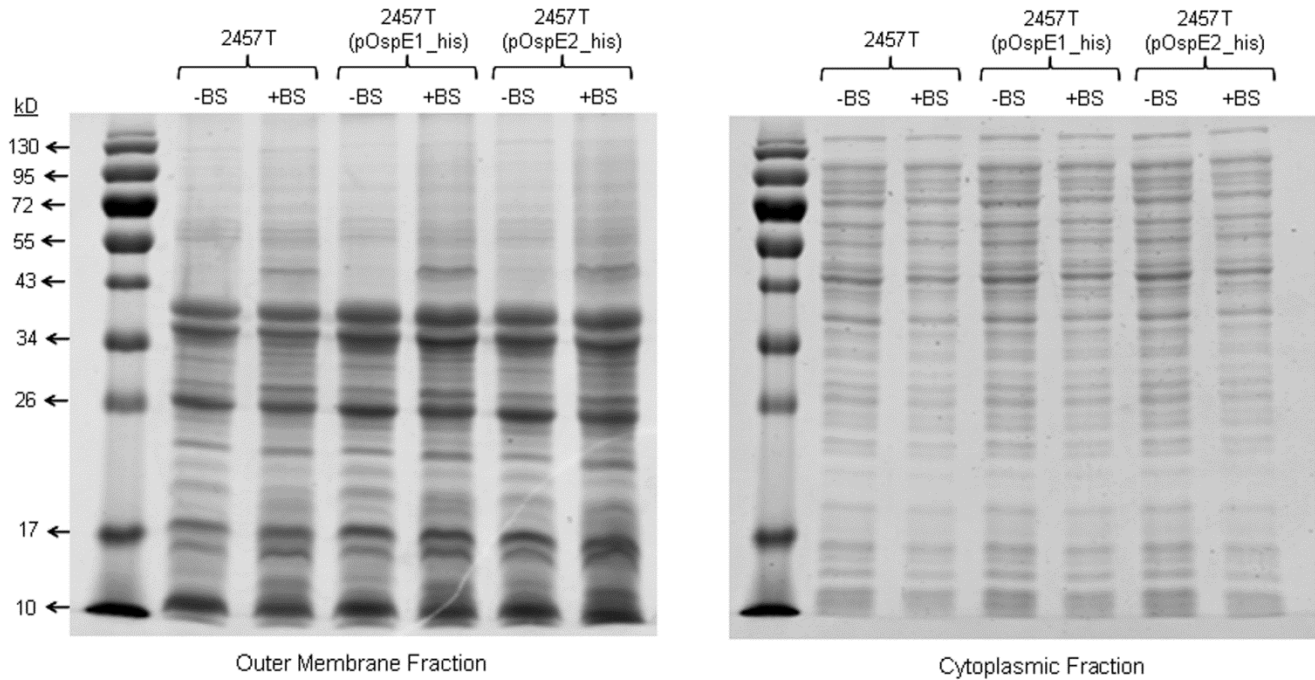

**Supplementary Figure 6: Protein profile of the outer membrane and cytoplasmic proteins obtained from ultracentrifugation of bacterial pellets.** The outer membrane (OM) fraction is on the left while the cytoplasmic fraction is on the right. The predominant OM proteins obtained are localized around 20 kD and between 25 to 45 kD. The protein profile agrees with previous OM preparations of *S. flexneri*.

Supplementary Table 1. Gene Expression Differences with Bile Salts

| Condition                 | Number of genes |  |  |  |  |
|---------------------------|-----------------|--|--|--|--|
| Increased with Bile Salts | 51              |  |  |  |  |
| Decreased with Bile Salts | 49              |  |  |  |  |

  

| Increased       |             |             |             |                  |                                                                         |
|-----------------|-------------|-------------|-------------|------------------|-------------------------------------------------------------------------|
| Affy_ID         | Bile        | No Bile     | Fold Change | p-value (t-test) | Annotation                                                              |
| b3238_s_at      | 11.89338131 | 9.241896533 | 6.283135874 | 0.00075986       | yhcN; hypothetical protein                                              |
| V5882_s_at      | 11.16186806 | 9.365784449 | 3.472762168 | 0.026755035      | sodA; superoxide dismutase                                              |
| A0384_s_at      | 7.740291355 | 5.964157753 | 3.425070307 | 0.000473746      | S2558 = hypothetical protein                                            |
| A2361_s_at      | 12.96499445 | 11.19408553 | 3.412688939 | 0.015980829      | groEL; chaperonin GroEL ; K04077                                        |
| V1059_s_at      | 11.36918459 | 9.735085829 | 3.10393589  | 3.45E-06         | acrB; acridine efflux pump                                              |
| b4142_s_at      | 13.38676818 | 11.7945722  | 3.015079364 | 0.017288551      | S4563; co-chaperonin GroES                                              |
| ECP_0524_s_at   | 13.10846068 | 11.55175855 | 2.941806039 | 1.94E-05         | acrA; acriflavine resistance protein A ; K03585 membrane fusion protein |
| N3131_x_at      | 5.899753118 | 4.361807791 | 2.903806514 | 0.015322546      | feoC; ferrous iron transport protein C                                  |
| V5247_s_at      | 5.715650963 | 4.194836461 | 2.869530089 | 0.02581015       | putative DNA-binding transcriptional regulator yhjC                     |
| V1345_s_at      | 11.41689535 | 9.901857735 | 2.858062802 | 0.024610015      | dnaK; chaperone protein DnaK; K04043 molecular chaperone DnaK           |
| A4409_s_at      | 9.322964834 | 7.828913669 | 2.816788349 | 0.001574581      | fumC; fumarate hydratase (EC:4.2.1.2); K01679                           |
| SDY_P046_s_at   | 11.95591012 | 10.47935119 | 2.78284186  | 0.001748628      | ospE1, ospE2                                                            |
| SD1_0506_x_at   | 6.328387215 | 4.867686562 | 2.752420038 | 0.013069522      | yhgG; hypothetical protein ; K07490 ferrous iron transport protein C    |
| b2141_s_at      | 9.341895935 | 7.891238751 | 2.733325329 | 0.043520369      | hypothetical protein ; K06518 holin-like protein                        |
| J2890_s_at      | 9.530872009 | 8.105862133 | 2.685163387 | 0.001543212      | nitroreductase S0847                                                    |
| V5836_s_at      | 9.527119852 | 8.116409624 | 2.658680154 | 0.046024159      | hslU; ATP-dependent protease ATP-binding subunit                        |
| EC536_1048_s_at | 12.57964756 | 11.1785387  | 2.641044957 | 0.044179779      | putative glutamate dehydrogenase                                        |
| V5908_s_at      | 7.378390553 | 5.989937315 | 2.61797848  | 0.00604376       | frvX; putative fructose-specific phosphotransferase system protein FrvX |
| A2145_s_at      | 11.89016846 | 10.50590518 | 2.610386217 | 0.026051502      | hslU; ATP-dependent protease ATP-binding subunit HslU                   |
| G2276_s_at      | 10.02210896 | 8.648092115 | 2.591912187 | 0.001045958      | mdaA; nitroreductase A ; K10678 nitroreductase                          |
| A3523_s_at      | 10.61286551 | 9.27334682  | 2.53066877  | 0.000329718      | ybjC; hypothetical protein                                              |
| V5594_at        | 9.182022346 | 7.859617491 | 2.500826299 | 0.002849686      | hypothetical protein                                                    |
| V5833_s_at      | 12.14027579 | 10.81961525 | 2.497804451 | 0.032638352      | hslV; ATP-dependent protease peptidase subunit                          |
| A1703_s_at      | 5.426804491 | 4.112141583 | 2.487442037 | 0.000383345      | treF; trehalase (EC:3.2.1.28); K01194                                   |
| SF1779_s_at     | 10.8118276  | 9.500645894 | 2.481447113 | 0.017258065      | hypothetical protein S1495                                              |
| EC869_0338_s_at | 5.750113751 | 4.441524987 | 2.476991236 | 0.023265408      | ferrous iron transport protein feoB                                     |
| H1461_s_at      | 6.995722777 | 5.7021473   | 2.451348288 | 0.002170631      | hypothetical protein S1495                                              |
| V0964_s_at      | 12.46527477 | 11.17886583 | 2.439201482 | 9.02E-05         | hypothetical protein S3465                                              |
| SB5_2172_s_at   | 9.513547017 | 8.244865137 | 2.409413285 | 0.001105965      | hypothetical protein S2452                                              |

|                 |             |             |             |             |                                                                                                                                                                                                                |
|-----------------|-------------|-------------|-------------|-------------|----------------------------------------------------------------------------------------------------------------------------------------------------------------------------------------------------------------|
| F1059_at        | 6.883998151 | 5.63920035  | 2.369853375 | 0.018766839 | hypothetical protein; NO_Kegg_data                                                                                                                                                                             |
| SBO_1654_s_at   | 9.371176785 | 8.143770554 | 2.341456491 | 0.008873785 | hypothetical protein S1495                                                                                                                                                                                     |
| SB5_2171_s_at   | 11.28710369 | 10.08435092 | 2.301784501 | 0.002389386 | inaA; hypothetical protein                                                                                                                                                                                     |
| EC869_3291_s_at | 10.52305953 | 9.344093034 | 2.264145229 | 0.010047002 | 3-oxoacyl-(acyl carrier protein) synthase                                                                                                                                                                      |
| SBO_1749_s_at   | 8.93761928  | 7.760097246 | 2.261879439 | 0.043549145 | ycjX; putative YcjX (EC:2.1.-.-); K06918                                                                                                                                                                       |
| SD1_2172_s_at   | 8.874930509 | 7.698983724 | 2.259411086 | 0.011037027 | fabB; 3-oxoacyl-(acyl carrier protein) synthase I                                                                                                                                                              |
| A2146_s_at      | 12.90792059 | 11.75004735 | 2.231282585 | 0.01850293  | hslV; ATP-dependent protease peptidase subunit                                                                                                                                                                 |
| b3236_s_at      | 11.43903747 | 10.28878837 | 2.219522136 | 0.030582084 | mdh; malate dehydrogenase (EC:1.1.1.37); K00026 malate dehydrogenase [EC:1.1.1.37]                                                                                                                             |
| SDY_4085_s_at   | 6.754055152 | 5.621591234 | 2.192328392 | 0.01013317  | glutamate transport protein gltS                                                                                                                                                                               |
| A3363_s_at      | 9.376647174 | 8.248111538 | 2.18636707  | 0.01426047  | sdhB; succinate dehydrogenase iron-sulfur subunit (EC:1.3.99.1); K00240 succinate dehydrogenase iron-sulfur protein [EC:1.3.99.1]                                                                              |
| EC869_5027_s_at | 9.368195546 | 8.250548153 | 2.16992833  | 0.017635438 | sdhA; succinate dehydrogenase flavoprotein subunit; K00239                                                                                                                                                     |
| A1888_s_at      | 10.47566153 | 9.3708929   | 2.150643846 | 0.018593741 | ibpA; heat shock protein IbpA ; K04080 molecular chaperone IbpA                                                                                                                                                |
| A4665_s_at      | 10.89396878 | 9.805140464 | 2.127012204 | 0.023412699 | eda; keto-hydroxyglutarate-aldolase/keto-deoxy- phosphogluconate aldolase (EC:4.1.2.14 4.1.3.16); K01625 2-dehydro-3-deoxyphosphogluconate aldolase / 4-hydroxy-2-oxoglutarate aldolase [EC:4.1.2.14 4.1.3.16] |
| A1588_s_at      | 10.77586188 | 9.703400151 | 2.103018766 | 0.022674728 | yhgl; putative DNA uptake protein ; K07400 Fe/S biogenesis protein NfuA                                                                                                                                        |
| b3441_s_at      | 7.813471036 | 6.743842726 | 2.098892549 | 0.015848732 | putative acetyltransferase YhhY ; K03825 putative acetyltransferase [EC:2.3.1.-]                                                                                                                               |
| V5109_s_at      | 6.253263274 | 5.18470699  | 2.0973335   | 0.01825132  | malS; periplasmic alpha-amylase precursor; K01176 alpha-amylase [EC:3.2.1.1]                                                                                                                                   |
| EC536_0230_s_at | 5.700737443 | 4.647555203 | 2.075101982 | 0.013999239 | yfeO; putative ion channel protein                                                                                                                                                                             |
| V6436_x_at      | 7.941270358 | 6.894613613 | 2.065737224 | 0.037294055 | hypothetical protein S1410                                                                                                                                                                                     |
| A4118_s_at      | 8.567344598 | 7.530494202 | 2.051743517 | 0.045590145 | hypothetical protein S1410                                                                                                                                                                                     |
| b3207_s_at      | 12.79397427 | 11.77678903 | 2.023966261 | 0.000167356 | yrbL; hypothetical protein                                                                                                                                                                                     |
| b0492_s_at      | 9.070914384 | 8.055521718 | 2.021453008 | 0.046428755 | ybbN; predicted thioredoxin domain-containing protein ; K05838 putative thioredoxin                                                                                                                            |
| EC869_5024_x_at | 7.220949116 | 6.21577251  | 2.007189189 | 0.019316711 | sdhA; succinate dehydrogenase flavoprotein subunit ; K00239                                                                                                                                                    |

#### Decreased

| Affy_ID         | Bile        | No Bile     | Fold Change  | p-value (t-test) | Annotation                                          |
|-----------------|-------------|-------------|--------------|------------------|-----------------------------------------------------|
| V5274_s_at      | 3.880931324 | 5.891527752 | -4.029487696 | 0.000372394      | hypothetical protein                                |
| b3512_s_at      | 5.01061716  | 6.889082905 | -3.676838335 | 0.00515398       | yhiE; hypothetical protein                          |
| EC869_2081_x_at | 6.119992984 | 7.734365095 | -3.061783156 | 0.003495379      | ccmF; cytochrome c-type biogenesis protein ; K02198 |
| F2824_s_at      | 4.223282457 | 5.785786853 | -2.95366129  | 0.026734404      | putative enzyme; K06889                             |
| S1481_at        | 5.561612611 | 7.123085044 | -2.951549287 | 0.037463794      | sokB = S1481; IS103 orf                             |



|                 |             |             |              |             |                                                                         |
|-----------------|-------------|-------------|--------------|-------------|-------------------------------------------------------------------------|
| A1183_s_at      | 7.92714577  | 9.471151493 | -2.916030325 | 0.007820975 | hybG; hydrogenase 2 accessory protein HypG ; K04653                     |
| V1312_s_at      | 3.616276946 | 5.152679132 | -2.900702194 | 0.043158598 | phosphoglycerate mutase ; K01834                                        |
| S1762_s_at      | 4.665645657 | 6.195549569 | -2.887666055 | 0.024905766 | putative transporter; K06956                                            |
| V0189_x_at      | 4.602752257 | 6.064862992 | -2.755111555 | 0.019788533 | nrfG; formate-dependent nitrite reductase complex subunit               |
| EC536_3469_s_at | 8.902851599 | 10.36405028 | -2.753370352 | 0.0092344   | ccmE; cytochrome c-type biogenesis protein CcmE ; K02197                |
| F2496_s_at      | 8.808115324 | 10.22467739 | -2.669486154 | 0.03381573  | ccmA; cytochrome c biogenesis protein CcmA ; K02193                     |
| V1726_s_at      | 9.102852512 | 10.48326015 | -2.603419213 | 0.016781277 | ccmE; cytochrome c-type biogenesis protein CcmE ; K02197                |
| F2493_s_at      | 9.490126433 | 10.8518449  | -2.569911129 | 0.020159885 | ccmC; heme exporter protein C ; K02195                                  |
| A0241_s_at      | 8.163029602 | 9.511928312 | -2.54717611  | 0.013194955 | ccmF; heme lyase, CcmF subunit; K02198                                  |
| b2199_s_at      | 8.42896917  | 9.768406635 | -2.530526296 | 0.012142961 | ccmC; heme exporter protein C ; K02195                                  |
| EC869_2075_s_at | 9.097887286 | 10.43501247 | -2.526473742 | 0.023190903 | ccmE; cytochrome c-type biogenesis protein CcmE ; K02197                |
| A0246_s_at      | 9.357965278 | 10.69495978 | -2.526244905 | 0.027058753 | ccmA; cytochrome c biogenesis protein CcmA ; K02193                     |
| c3620_s_at      | 8.57434894  | 9.889302147 | -2.48794261  | 0.032291124 | putative secreted autotransporter toxin S3965                           |
| V2998_s_at      | 8.878693389 | 10.18901723 | -2.479972019 | 0.002380227 | evgS; hybrid sensory histidine kinase                                   |
| V1722_s_at      | 9.10194195  | 10.39659195 | -2.453174732 | 0.025231561 | ccmB; heme exporter protein B ; K02194                                  |
| SB5_2059_s_at   | 8.196709188 | 9.456856915 | -2.395202657 | 0.009176035 | evgS; hybrid sensory histidine kinase                                   |
| EC869_4712_s_at | 5.977258274 | 7.233390336 | -2.388545008 | 0.029064788 | hypothetical protein                                                    |
| A1184_s_at      | 8.636220483 | 9.859609811 | -2.334946231 | 0.023318945 | hybF; HybF protein; K04651                                              |
| SDY_2117_s_at   | 5.661990041 | 6.854321219 | -2.285217017 | 0.006726165 | putative bacteriophage protein S0691                                    |
| V1729_s_at      | 9.78561179  | 10.96280559 | -2.261364895 | 0.025968744 | cytochrome c-type biogenesis protein                                    |
| EC869_2076_s_at | 9.395195543 | 10.56857101 | -2.255387721 | 0.016258205 | ccmF; cytochrome c-type biogenesis protein ; K02198                     |
| EC869_2084_s_at | 9.097565661 | 10.26867837 | -2.251853092 | 0.047299796 | dsbE; disulfide oxidoreductase ; K02199                                 |
| V4544_x_at      | 5.954740259 | 7.119823328 | -2.24246127  | 0.03043683  | argI; ornithine carbamoyltransferase subunit I                          |
| A4083_s_at      | 6.39372548  | 7.557849646 | -2.24097129  | 0.017666355 | hypothetical protein S1376; ycjD                                        |
| SD1_3403_s_at   | 5.804406499 | 6.95912328  | -2.226406122 | 0.03987058  | glutamate and aspartate transporter subunit ; K10001                    |
| EC869_5555_s_at | 6.614653846 | 7.763387676 | -2.217192189 | 0.01235153  | ornithine carbamoyltransferase 1                                        |
| Z4493_s_at      | 4.177372423 | 5.317649366 | -2.204233321 | 0.044205839 | agaC; N-acetylgalactosamine-specific PTS system transporter subunit IIC |
| A0243_s_at      | 8.746430337 | 9.885938775 | -2.203059465 | 0.027381936 | ccmD; heme exporter protein C ; K02196                                  |
| A0240_s_at      | 8.997117664 | 10.13505806 | -2.20066629  | 0.040945632 | dsbE; disulfide oxidoreductase ; K02199                                 |
| SB5_1951_s_at   | 7.571256025 | 8.686675201 | -2.166579499 | 0.039956996 | S2797; yfhL hypothetical protein                                        |
| O2CoIV74_at     | 3.760037207 | 4.838747344 | -2.11214684  | 0.027463077 | ISSfI4 ORF3 ; K07484 transposase                                        |
| ECP_2234_s_at   | 8.980594011 | 10.05891304 | -2.111574329 | 0.047338116 | cytochrome c-type biogenesis protein CcmH precursor; K02200             |
| SD1_2150_s_at   | 5.648741242 | 6.726901517 | -2.11134198  | 0.001912015 | S0592; ybgQ; putative outer membrane protein                            |
| EC536_0524_x_at | 8.46261721  | 9.537002886 | -2.105825185 | 0.036723139 | hybE; hydrogenase 2-specific chaperone                                  |
| S0688_s_at      | 3.957037152 | 5.028067933 | -2.100933913 | 0.015461997 | hypothetical protein; S0688                                             |
| SS5_4161_s_at   | 9.288658067 | 10.35561266 | -2.095006311 | 0.009799359 | putative bacteriophage protein; S0693                                   |
| SS5_4621_s_at   | 6.988845765 | 8.046495086 | -2.08153717  | 0.046271452 | yihF; hypothetical protein                                              |
| EC869_7558_s_at | 6.504189076 | 7.5582349   | -2.076344491 | 0.001923349 | dcuC; C4-dicarboxylate transporter DcuC ; K03326                        |
| A3108_s_at      | 3.779970621 | 4.827761866 | -2.067362308 | 0.002970713 | glnK; nitrogen regulatory protein P-II 2 ; K04752                       |

|                  |             |             |              |             |                                                        |
|------------------|-------------|-------------|--------------|-------------|--------------------------------------------------------|
| SS5_1921_s_at    | 5.271211014 | 6.314800285 | -2.061349697 | 0.000310492 | molR_1; molybdate metabolism regulator, first fragment |
| V2689_s_at       | 9.614462909 | 10.64579722 | -2.043913743 | 0.040027718 | hybD; hydrogenase 2 maturation endopeptidase ; K08567  |
| UT189_C2904_s_at | 3.650827694 | 4.669953653 | -2.026690738 | 0.029184225 | conserved hypothetical protein, putative Z3866 protein |
| SD1_0026_at      | 3.182008664 | 4.193741699 | -2.016331761 | 0.031721717 | asnA; asparagine synthetase AsnA                       |
| A0247_s_at       | 11.06481688 | 12.07397808 | -2.012740527 | 0.038923611 | hypothetical protein; S2416; napC                      |

Supplementary Table 2. Primers used in this study.

| Purpose                                         | Forward Primer |                                                                                          | Reverse Primer |                                                                                           |
|-------------------------------------------------|----------------|------------------------------------------------------------------------------------------|----------------|-------------------------------------------------------------------------------------------|
|                                                 | Name           | Sequence                                                                                 | Name           | Sequence                                                                                  |
| <b>Deletions</b>                                |                |                                                                                          |                |                                                                                           |
| Amplify <i>aphA-3</i> for <i>ospE1</i> deletion | E1kanF         | 5' – CTTGTCTTCCACAAAAACAAGA<br>AAATATCATCCTTGAAGTATCAAA<br>TCATATGAATACCTCCTTAGTTCC – 3' | E1kanR         | 5' – CTTTGTTTTTTCATCAATTCCGGCTT<br>CATTATCTTTGTCAACCATTGCATTGTG<br>TAGGCTGGAGCTGCTTC – 3' |
| Confirm $\Delta$ <i>ospE1</i>                   | E1F            | 5' – AGTCATCGGCTCCTTCATTG – 3'                                                           | E1R            | 5' – AGGTATTTAAGGTCATTGCG – 3'                                                            |
| Amplify <i>cat</i> for <i>ospE2</i> deletion    | E2catF         | 5' – TTAATAAAATATAACATAAGGA<br>AGCAATATGCTTACACAACTATATTC<br>CTGTGTAGGCTGGAGCTGCTTC – 3' | E2catR         | 5' – TGGAGCTTAAACGAGTCTGAAATTAA<br>CTTCAGAAATCAGAATACCGTTGGCATAT<br>GAATACCTCCTTAG – 3'   |
| Confirm $\Delta$ <i>ospE2</i>                   | E2F            | 5' – TCTGGCTCCACATCTCATCG – 3'                                                           | E2R            | 5' – ACCGTATCGAGGATAGATGG – 3'                                                            |
| <b>qRT-PCR</b>                                  |                |                                                                                          |                |                                                                                           |
| <i>rpoA</i>                                     | rpoAF          | 5' – AGCGCGGTCTGTGGTTATGTG – 3'                                                          | rpoAR          | 5' – CGCTGCTTCAACATTGTAGG – 3'                                                            |
| <i>ospE1/2</i>                                  | ospEF          | 5' – CACAACTATATCCCTTGC – 3'                                                             | ospER          | 5' – TTTCAACGTTTTTCGTCCGGT – 3'                                                           |
| <i>ccmF</i>                                     | ccmFF          | 5' – TCGGCATTGTGCTCGGTTCC – 3'                                                           | ccmFR          | 5' – TGACCGCCAGTGAGTGCATC – 3'                                                            |
| <i>yhcN</i>                                     | yhcNF          | 5' – GCTGCCGACTCCATTGATGC – 3'                                                           | yhcNR          | 5' – CCGTTGCGCCTTTCTCTTCC – 3'                                                            |
| <i>ybgQ</i>                                     | ybgQF          | 5' – GGTGACGATCAGTCAATCAG – 3'                                                           | ybgQR          | 5' – TTCACCCGACCATCTTCTTC – 3'                                                            |
| <b>Cloning</b>                                  |                |                                                                                          |                |                                                                                           |
| Amplify <i>ospE1</i> for pCSF1                  | E1F            | 5' – AGTCATCGGCTCCTTCATTG – 3'                                                           | E1R            | 5' – AGGTATTTAAGGTCATTGCG – 3'                                                            |
| Amplify <i>ospE2</i> for pCSF2                  | E2F            | 5' – TCTGGCTCCACATCTCATCG – 3'                                                           | E2R            | 5' – ACCGTATCGAGGATAGATGG – 3'                                                            |
| Amplify <i>ospE</i> for pOspE <sup>+</sup>      | E3F            | 5' – ATGCGGATCCCAGTAACTTC<br>ATTTAGCCGAC – 3'                                            | ER2            | 5' – TCAGAAATCAGAATACCGTTGG – 3'                                                          |
| Amplify <i>ospE1</i> for pCSF3                  | E3F            | 5' – ATGCGGATCCCAGTAACTTC<br>ATTTAGCCGAC – 3'                                            | EhisR          | 5' – TCAATGATGATGATGATGATGATG<br>GAAATCAGAATACCGTTGGC – 3'                                |

Amplify  
*ospE2* for  
pCSF4

E3F

5' – ATGCGGATCCCAGTAACTTC  
ATTTAGCCGAC – 3'

EhisR

5' – TCAATGATGATGATGATGATGATG  
GAAATCAGAATACCGTTGGC – 3'

---
